# Supplementary material
Source: PubMed Central journal article supplement (PMC7222906)
Supplement: 134_2019_5908_MOESM1_ESM.pdf [file 134_2019_5908_MOESM1_ESM.pdf]

## Electronic Supplement File

Shankar-Hari M et al. Rate and risk factors for rehospitalisation: systematic review

### eTables

eTable 1: Literature search strategy

eTable 2: Egger's test for small study effects

eFigure-1: Random effect meta-analysis of 30-day rehospitalisation proportions by studies reporting competing risk analysis

eFigure-2: eFigure-2: Random effect meta-analysis of 30-day rehospitalisation proportions by risk of bias assessments in studies published as full research papers

eMethods 1 (reference list): Summary list of included studies and the list of excluded studies after full text review with reasons for exclusions

MOOSE Checklist

This supplementary material has been provided by the authors to give readers additional information about their work.



|    |                                                                                                                                                                                                                                                                                                                                                                                                                             |
|----|-----------------------------------------------------------------------------------------------------------------------------------------------------------------------------------------------------------------------------------------------------------------------------------------------------------------------------------------------------------------------------------------------------------------------------|
|    | OR sepsis syndromes[MeSH Terms] OR septicaemia[Title/Abstract] OR septicemia[Title/Abstract] OR sepsis[Title/Abstract] OR septic*[Title/Abstract])) AND ( "1992/01/01"[PDat] : "2016/12/31"[PDat] ) AND adult[MeSH]) Filters: Publication date from 1992/01/01 to 2016/12/31; Adult: 19+ years                                                                                                                              |
| #6 | Search (((((((("sepsis"[MeSH Terms] OR sepsis, severe[MeSH Terms] OR sepsis syndrome[MeSH Terms] OR sepsis syndromes[MeSH Terms] OR septicaemia[Title/Abstract] OR septicemia[Title/Abstract] OR sepsis[Title/Abstract] OR septic*[Title/Abstract])) Filters: Publication date from 1992/01/01 to 2016/12/31; Adult: 19+ years                                                                                              |
| #5 | Search ((((((readmissions, patient[MeSH Terms] OR patient readmissions[MeSH Terms] OR hospital readmissions[MeSH Terms] OR readmissions[Title/Abstract] OR readmissions, hospital[MeSH Terms])) OR (((discharge planning[MeSH Terms] OR discharge plannings[MeSH Terms] OR discharge[Title/Abstract] OR national hospital discharge survey[MeSH Terms]) Filters: Publication date from 1992/01/01; Humans; Adult: 19+ years |
| #4 | Search "infection"[MeSH Terms] Filters: Publication date from 1992/01/01; Humans; Adult: 19+ years                                                                                                                                                                                                                                                                                                                          |
| #3 | Search (((discharge planning[MeSH Terms] OR discharge plannings[MeSH Terms] OR discharge[Title/Abstract] OR national hospital discharge survey[MeSH Terms]                                                                                                                                                                                                                                                                  |
| #2 | Search (((((readmissions, patient[MeSH Terms] OR patient readmissions[MeSH Terms] OR hospital readmissions[MeSH Terms] OR readmissions[Title/Abstract] OR readmissions, hospital[MeSH Terms]                                                                                                                                                                                                                                |

**eTable 2 Egger's test for small study effects at 7-, 30-, 90-, 180- and 365-days proportions**

| Rehospitalisation interval | Number of studies | Root Mean Square Error | P value for Test of H0: no small study effects |
|----------------------------|-------------------|------------------------|------------------------------------------------|
| 0 to 7 days                | 5                 | -                      | -                                              |
| 0 to 30 days               | 36                | 38.5                   | 0.29                                           |
| 0 to 90 days               | 15                | 8.10                   | 0.13                                           |
| 0 to 180 days              | 8                 | -                      | -                                              |
| 0 to 365 days              | 5                 | -                      | -                                              |

**eFigure-1: Random effect meta-analysis of 30-day rehospitalisation proportions by studies reporting competing risk analysis**

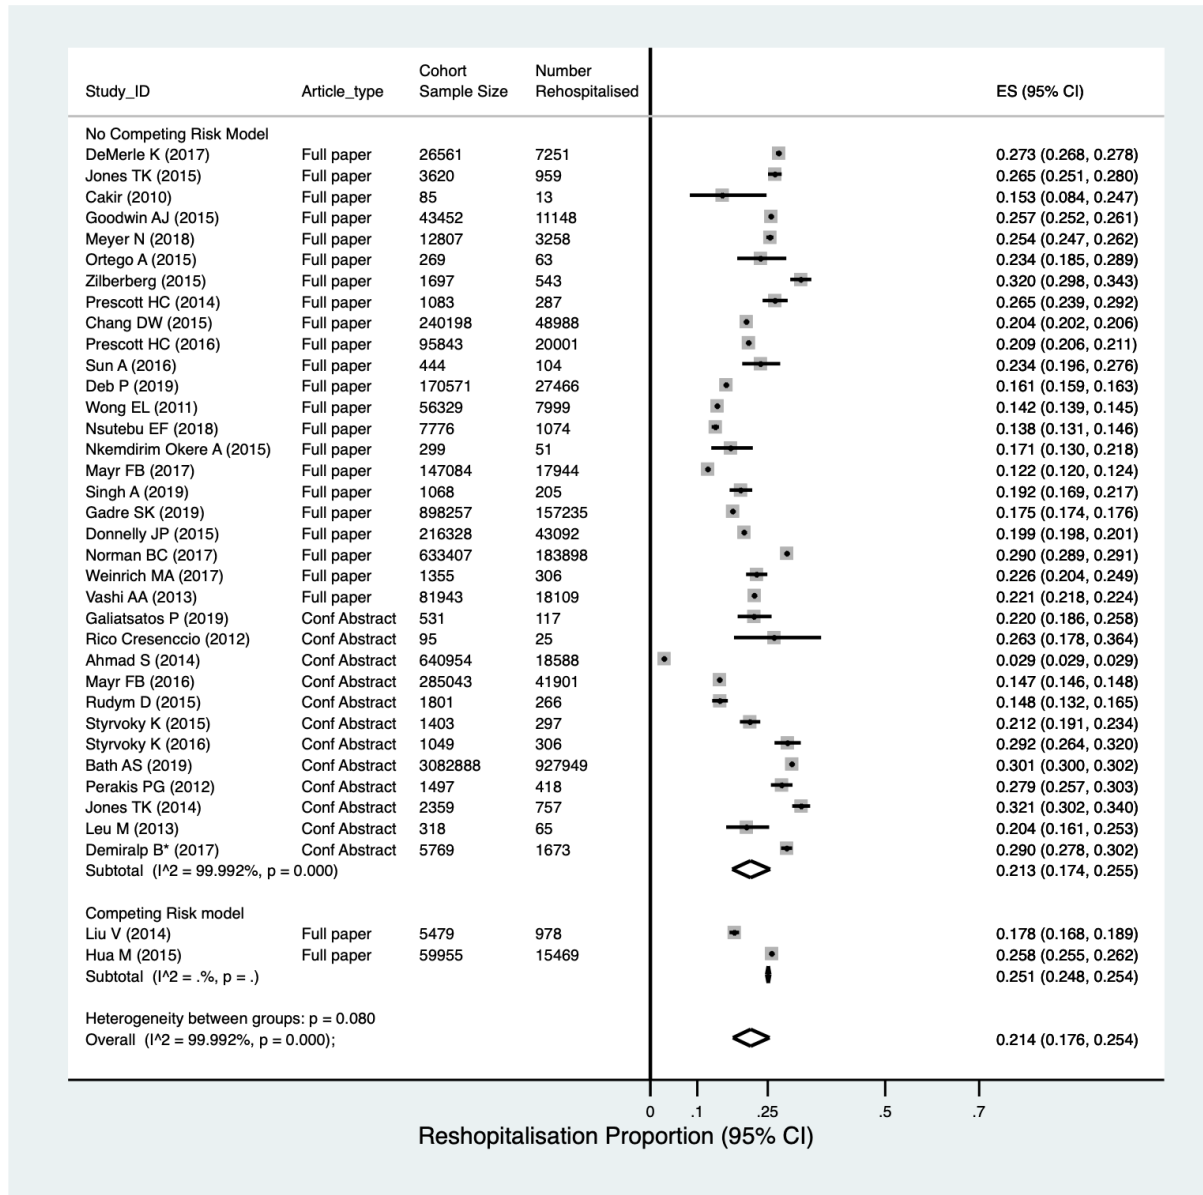

The interaction p-value for difference between two proportions was not significant (p=0.08).

**eFigure-2: Random effect meta-analysis of 30-day rehospitalisation proportions by risk of bias assessments in studies published as full research papers**

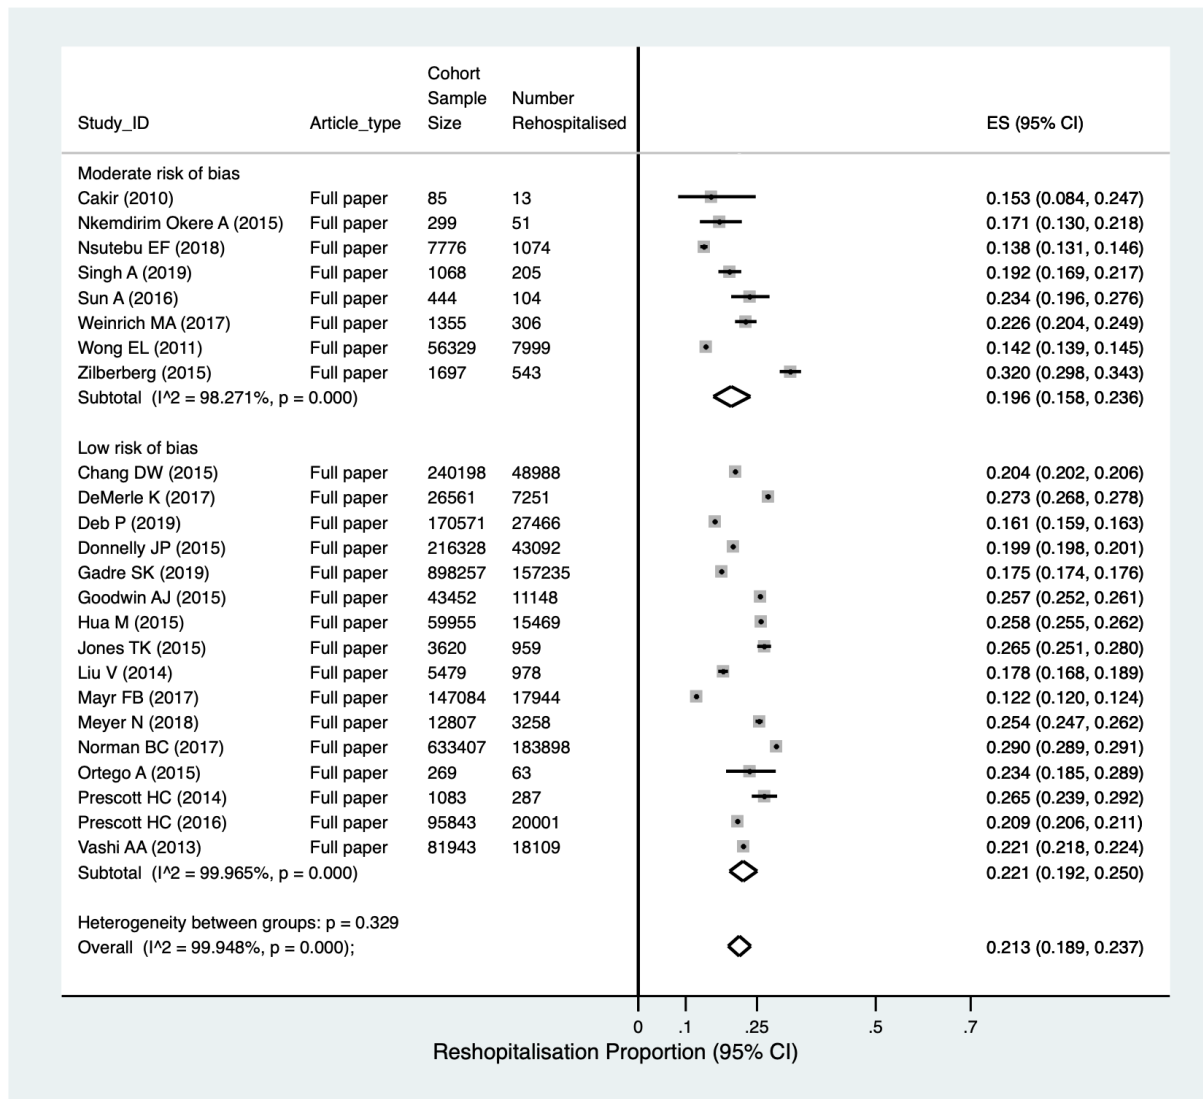

The interaction p-value for difference between two proportions was not significant ( $p=0.33$ ).

## eMethods 1: Summary list of *included* studies and the list of *excluded* studies after full text review with reasons for exclusions

### Included studies

- **Full manuscripts (N=36)**  
References [1-35]
- **Conference abstracts (N=20)**  
References [36-55]

### Excluded studies with reasons

- **Full manuscripts [56-98]**  
Not explicitly reported as sepsis cohort (n=24)  
No sepsis survivor rehospitalisation data (n=8)  
Qualitative study (n=3)  
Cost analysis (n=2)  
Older adults only (n=2)  
Patients with seizures as comorbidity (n=1)  
Single gene defect (n=1)  
In-hospital ICU readmission (n=2)  
Letter to editor on a full manuscript (n=2)
- **Conference abstracts [99-108]**

### References

1. Braun L, Riedel AA, Cooper LM, (2004) Severe sepsis in managed care: analysis of incidence, one-year mortality, and associated costs of care. *J Manag Care Pharm* 10: 521-530
2. Cakir B, Gammon G, (2010) Evaluating readmission rates: how can we improve? *Southern medical journal* 103: 1079-1083
3. Chang DW, Tseng CH, Shapiro MF, (2015) Rehospitalizations Following Sepsis: Common and Costly. *Crit Care Med* 43: 2085-2093
4. Deb P, Murtaugh CM, Bowles KH, Mikkelsen ME, Khajavi HN, Moore S, Barron Y, Feldman PH, (2019) Does Early Follow-Up Improve the Outcomes of Sepsis Survivors Discharged to Home Health Care? *Med Care* 57: 633-640
5. DeMerle KM, Vincent BM, Iwashyna TJ, Prescott HC, (2017) Increased healthcare facility use in veterans surviving sepsis hospitalization. *J Crit Care* 42: 59-64
6. Dick A, Liu H, Zwanziger J, Perencevich E, Furuya EY, Larson E, Pogorzelska-Maziarz M, Stone PW, (2012) Long-term survival and healthcare utilization outcomes attributable to sepsis and pneumonia. *BMC health services research* 12: 432
7. Dietz BW, Jones TK, Small DS, Gaieski DF, Mikkelsen ME, (2016) The Relationship Between Index Hospitalizations, Sepsis, and Death or Transition to Hospice Care During 30-Day Hospital Readmissions. *Medical care*
8. Donnelly JP, Hohmann SF, Wang HE, (2015) Unplanned Readmissions After Hospitalization for Severe Sepsis at Academic Medical Center-Affiliated Hospitals. *Crit Care Med* 43: 1916-1927
9. Gadre SK, Shah M, Mireles-Cabodevila E, Patel B, Duggal A, (2019) Epidemiology and Predictors of 30-Day Readmission in Patients With Sepsis. *Chest* 155: 483-490
10. Goodwin AJ, Rice DA, Simpson KN, Ford DW, (2015) Frequency, cost, and risk factors of readmissions among severe sepsis survivors. *Crit Care Med* 43: 738-746
11. Guirgis FW, Brakenridge S, Sutchu S, Khadpe JD, Robinson T, Westenbarger R, Topp ST, Kalynych CJ, Reynolds J, Dodani S, Moore FA, Jones AE, (2016) The long-term burden of severe sepsis and septic shock: Sepsis recidivism and organ dysfunction. *J Trauma Acute Care Surg* 81: 525-532
12. Hua M, Gong MN, Brady J, Wunsch H, (2015) Early and late unplanned rehospitalizations for survivors of critical illness\*. *Crit Care Med* 43: 430-438
13. Jones TK, Fuchs BD, Small DS, Halpern SD, Hanish A, Umscheid CA, Baillie CA, Kerlin MP, Gaieski DF, Mikkelsen ME, (2015) Post-Acute Care Use and Hospital Readmission after Sepsis. *Annals of the American Thoracic Society* 12: 904-913
14. Kim JS, Kim YJ, Ryoo SM, Sohn CH, Ahn S, Seo DW, Lim KS, Kim WY, (2019) Risk Factors for Same Pathogen Sepsis Readmission Following Hospitalization for Septic Shock. *J Clin Med* 8
15. Liu V, Lei X, Prescott HC, Kipnis P, Iwashyna TJ, Escobar GJ, (2014) Hospital readmission and healthcare utilization following sepsis in community settings. *J Hosp Med* 9: 502-507
16. Mayr FB, Talisa VB, Balakumar V, Chang CH, Fine M, Yende S, (2017) Proportion and Cost of Unplanned 30-Day Readmissions After Sepsis Compared With Other Medical Conditions. *JAMA* 317: 530-531
17. Meyer N, Harhay MO, Small DS, Prescott HC, Bowles KH, Gaieski DF, Mikkelsen ME, (2018) Temporal Trends in Incidence, Sepsis-Related Mortality, and Hospital-Based Acute Care After Sepsis. *Crit Care Med* 46: 354-360
18. Nkemdirim Okere A, Renier CM, (2015) Effects of Statins on Hospital Length of Stay and All-Cause Readmissions Among Hospitalized Patients With a Primary Diagnosis of Sepsis. *The Annals of pharmacotherapy* 49: 1273-1283
19. Norman BC, Cooke CR, Ely EW, Graves JA, (2017) Sepsis-Associated 30-Day Risk-Standardized Readmissions: Analysis of a Nationwide Medicare Sample. *Crit Care Med* 45: 1130-1137

20. Nsutebu EF, Ibarz-Pavon AB, Kanwar E, Prospero N, French N, McGrath C, (2018) Advancing quality in sepsis management: a large-scale programme for improving sepsis recognition and management in the North West region of England. *Postgraduate medical journal* 94: 463-468
21. Ortego A, Gaieski DF, Fuchs BD, Jones T, Halpern SD, Small DS, Sante SC, Drumheller B, Christie JD, Mikkelsen ME, (2015) Hospital-based acute care use in survivors of septic shock. *Crit Care Med* 43: 729-737
22. Prescott HC, (2016) Variation in Post-Sepsis Readmission Patterns: A Cohort Study of Veterans Affairs Beneficiaries. *Annals of the American Thoracic Society*
23. Prescott HC, Dickson RP, Rogers MA, Langa KM, Iwashyna TJ, (2015) Hospitalization Type and Subsequent Severe Sepsis. *Am J Respir Crit Care Med* 192: 581-588
24. Prescott HC, Langa KM, Iwashyna TJ, (2015) Readmission diagnoses after hospitalization for severe sepsis and other acute medical conditions. *JAMA* 313: 1055-1057
25. Prescott HC, Langa KM, Liu V, Escobar GJ, Iwashyna TJ, (2014) Increased 1-year healthcare use in survivors of severe sepsis. *Am J Respir Crit Care Med* 190: 62-69
26. Schnegelsberg A, Mackenhauer J, Nibro HL, Dreyer P, Koch K, Kirkegaard H, (2016) Impact of socioeconomic status on mortality and unplanned readmission in septic intensive care unit patients. *Acta anaesthesiologica Scandinavica* 60: 465-475
27. Singh A, Bhagat M, George SV, Gorthi R, Chaturvedula C, (2019) Factors Associated with 30-day Unplanned Readmissions of Sepsis Patients: A Retrospective Analysis of Patients Admitted with Sepsis at a Community Hospital. *Cureus* 11: e5118
28. Sun A, Netzer G, Small DS, Hanish A, Fuchs BD, Gaieski DF, Mikkelsen ME, (2016) Association Between Index Hospitalization and Hospital Readmission in Sepsis Survivors. *Crit Care Med* 44: 478-487
29. Sutton JP, Friedman B (2013) Trends in Septicemia Hospitalizations and Readmissions in Selected HCUP States, 2005 and 2010: Statistical Brief #161Healthcare Cost and Utilization Project (HCUP) Statistical Briefs. Agency for Healthcare Research and Quality (US), Rockville (MD)
30. Vashi AA, Fox JP, Carr BG, D'Onofrio G, Pines JM, Ross JS, Gross CP, (2013) Use of hospital-based acute care among patients recently discharged from the hospital. *JAMA* 309: 364-371
31. Wang T, Derhovansian A, De Cruz S, Belperio JA, Deng JC, Hoo GS, (2014) Subsequent infections in survivors of sepsis: epidemiology and outcomes. *J Intensive Care Med* 29: 87-95
32. Weinreich MA, Styrvoky K, Chang S, Girod CE, Ruggiero R, (2017) Sepsis at a Safety Net Hospital: Risk Factors Associated With 30-Day Readmission. *J Intensive Care Med*: 885066617726753
33. Wong EL, Cheung AW, Leung MC, Yam CH, Chan FW, Wong FY, Yeoh EK, (2011) Unplanned readmission rates, length of hospital stay, mortality, and medical costs of ten common medical conditions: a retrospective analysis of Hong Kong hospital data. *BMC health services research* 11: 149
34. Yende S, Kellum JA, Talisa VB, Peck Palmer OM, Chang CH, Filbin MR, Shapiro NI, Hou PC, Venkat A, LoVecchio F, Hawkins K, Crouser ED, Newman AB, Angus DC, (2019) Long-term Host Immune Response Trajectories Among Hospitalized Patients With Sepsis. *JAMA Netw Open* 2: e198686
35. Zilberberg MD, Shorr AF, Micek ST, Kollef MH, (2015) Risk factors for 30-day readmission among patients with culture-positive severe sepsis and septic shock: A retrospective cohort study. *J Hosp Med* 10: 678-685
36. Ahmad S, Baig S, Taneja A, Nanchal R, Kumar G, (2014) The outcomes of severe sepsis in homeless. *Chest* 146: no pagination
37. Bath AS, Farishta M, Deepak V, (2019) Trends and 30-Day Readmission Rate for Patients Discharged with Septicemia: Analysis of 3,082,888 Admissions. *American Journal of Respiratory and Critical Care Medicine* 199
38. Demiralp B, He F, Koenig L, Hengesbach D, Prister J, (2017) A Regional Analysis Of Patient Outcomes And Medicare Payments For Sepsis Patients Treated In Long-Term Care Hospitals And Skilled Nursing Facilities. *American Journal of Respiratory and Critical Care Medicine* 195
39. Galiatsatos P, Follin A, Uradu N, Alghanim F, Daniel Y, Saria S, Townsend J, Sylvester C, Chanmugam A, Chen ES, (2019) The Association Between Neighborhood Socioeconomic Disadvantage and Readmissions for Patients Hospitalized with Sepsis. *American Journal of Respiratory and Critical Care Medicine* 199
40. Jones TK, Fuchs BD, Small DS, Halpern SD, Hanish A, Baillie C, Umscheid CA, Kerlin MP, Gaieski DF, Mikkelsen ME, (2014) Severe Sepsis Is Associated With High Rates Of Hospital Readmission. *American Journal of Respiratory and Critical Care Medicine* 189: no pagination
41. Kaplan M, Chowdhury MAB, Hurwitz J, Metellus V, Martin E, Elie MC, (2017) Sepsis Recidivism: Return Visits and Recurrence (S3R Analysis). *Annals of emergency medicine* 70: S60-S60
42. Kopterides P, Diane I, Lucko N, Shapiro N, Hou P, Filbin M, Kellum J, Yende S, (2015) Rehospitalizations and Fatal Outcome Are Common among Severe Sepsis Survivors. *Critical Care Medicine* 43: 252
43. Leu M, Gonzalez C, Rico-Crescencio J, Kaur T, Kanna B, Loganathan R, (2013) Survivors Of Severe Sepsis/septic Shock - A Need To Focus On Healthcare Utilization Post-Discharge Among Inner-City Minority New-Yorkers. *American Journal of Respiratory and Critical Care Medicine* 187: no pagination
44. Leung S, Gong MN, (2012) Healthcare utilization prior to and following patients admitted to the ICU with severe sepsis. *American Journal of Respiratory and Critical Care Medicine* 185: no pagination
45. Mayr F, Balakumar V, Talisa V, Fine M, Yende S, (2016) Understanding the Burden of Unplanned Sepsis Readmissions. *Critical Care Medicine* 44: 409
46. Perakis PG, Rubinfeld I, Narayana A, Cumba M, Takis L, Coba V, Blyden D, Horst M, (2012) Hospital Readmission Incidence for Septic Patients from the Surgical Intensive Care Unit. *Shock* 37: 76-76
47. Prescott HC, Langa KM, Iwashyna TJ, (2015) Forty Percent Of Hospitalizations After Severe Sepsis Are Potentially Preventable. *American Journal of Respiratory and Critical Care Medicine* 191: no pagination
48. Rice D, Goodwin AJ, Simpson K, Ford DW, (2014) Risk Factors For 30-Day Hospital Readmissions In Sepsis. *American Journal of Respiratory and Critical Care Medicine* 189: no pagination
49. Rice D, Simpson K, Goodwin A, Ford D, (2013) Patterns of Hospital Readmission Following an Index Hospitalization for Sepsis. *Chest* 144: no pagination
50. Rico Crescencio JC, Leu\* M, Balaventakesh B, Loganathan R, (2012) REadmissions among patients with severe sepsis/septic shock among inner-city minority new yorkers. *Chest* 142: 286A-286A
51. Rudym D, Uppal A, Evans L, (2015) Readmission Rates In Severe Sepsis. *American Journal of Respiratory and Critical Care Medicine* 191: no pagination

52. Styrvoky K, Weinreich M, Girod C, Ruggiero R, (2015) Beyond Surviving Sepsis: Thirty-Day Readmission Rates and Patient Characteristics at a Safety Net Hospital. *Chest* 148: no pagination
53. Styrvoky K, Weinreich M, Girod CE, Ruggiero RM, (2016) Risk Factors For Thirty-Day Readmissions Among Sepsis Survivors At A Safety Net Hospital. *American Journal of Respiratory and Critical Care Medicine* 193
54. Tsen R, Seoane L, Li D, Pavlov A, Winterbottom F, Nash T, (2015) Frequency And Timing Of Readmissions Among Survivors Of Severe Sepsis And Septic Shock. *American Journal of Respiratory and Critical Care Medicine* 191
55. Whiles B, Deis A, Miller P, Simpson S, (2016) Comorbid conditions predict outcomes in patients with severe sepsis. *Chest* 149: A170
56. Adamuz J, Viasus D, Jimenez-Martinez E, Isla P, Garcia-Vidal C, Dorca J, Carratala J, (2014) Incidence, timing and risk factors associated with 1-year mortality after hospitalization for community-acquired pneumonia. *J Infect* 68: 534-541
57. Aliberti S, Peyrani P, Filardo G, Mirsaeidi M, Amir A, Blasi F, Ramirez JA, (2011) Association between time to clinical stability and outcomes after discharge in hospitalized patients with community-acquired pneumonia. *Chest* 140: 482-488
58. Anonymous, (2012) Collaboration eliminates sepsis readmissions. *Hospital case management : the monthly update on hospital-based care planning and critical paths* 20: 38-43
59. Arefian H, Heublein S, Scherag A, Brunkhorst FM, Younis MZ, Moerer O, Fischer D, Hartmann M, (2017) Hospital-related cost of sepsis: A systematic review. *J Infect* 74: 107-117
60. Ayau P, Bardossy AC, Sanchez G, Ortiz R, Moreno D, Hartman P, Rizvi K, Prentiss TC, Perri MB, Mahan M, Huang V, Reyes K, Zervos MJ, (2017) Risk Factors for 30-Day Mortality in Patients with Methicillin-Resistant *Staphylococcus aureus* Bloodstream Infections. *Int J Infect Dis* 61: 3-6
61. Burnham JP, Kwon JH, Olsen MA, Babcock HM, Kollef MH, (2018) Readmissions With Multidrug-Resistant Infection in Patients With Prior Multidrug Resistant Infection. *Infect Control Hosp Epidemiol* 39: 12-19
62. Burnham JP, Olsen MA, Stwalley D, Kwon JH, Babcock HM, Kollef MH, (2018) Infectious Diseases Consultation Reduces 30-Day and 1-Year All-Cause Mortality for Multidrug-Resistant Organism Infections. *Open Forum Infect Dis* 5: ofy026
63. Capelastegui A, Espana PP, Quintana JM, Bilbao A, Menendez R, Zalacain R, Torres A, (2009) Development of a prognostic index for 90-day mortality in patients discharged after admission to hospital for community-acquired pneumonia. *Thorax* 64: 496-501
64. Capelastegui A, Espana PP, Quintana JM, Gallarreta M, Gorordo I, Esteban C, Urrutia I, Bilbao A, (2008) Declining length of hospital stay for pneumonia and postdischarge outcomes. *The American journal of medicine* 121: 845-852
65. Capelastegui A, Espana Yandiola PP, Quintana JM, Bilbao A, Diez R, Pascual S, Pulido E, Egurrola M, (2009) Predictors of short-term rehospitalization following discharge of patients hospitalized with community-acquired pneumonia. *Chest* 136: 1079-1085
66. Cecere LM, Rubenfeld GD, Park DR, Root RK, Goss CH, (2010) Long-term survival after hospitalization for community-acquired and healthcare-associated pneumonia. *Respiration; international review of thoracic diseases* 79: 128-136
67. Chao PW, Shih CJ, Lee YJ, Tseng CM, Kuo SC, Shih YN, Chou KT, Tarng DC, Li SY, Ou SM, Chen YT, (2014) Association of postdischarge rehabilitation with mortality in intensive care unit survivors of sepsis. *Am J Respir Crit Care Med* 190: 1003-1011
68. Chen SY, Wu GH, Chang SC, Hsueh PR, Chiang WC, Lee CC, Ma MH, Hung CC, Chen YC, Su CP, Tsai KC, Chen TH, Chen SC, Chen WJ, (2008) Bacteremia in previously hospitalized patients: prolonged effect from previous hospitalization and risk factors for antimicrobial-resistant bacterial infections. *Annals of emergency medicine* 51: 639-646
69. Dagan E, Novack V, Porath A, (2006) Adverse outcomes in patients with community acquired pneumonia discharged with clinical instability from Internal Medicine Department. *Scandinavian journal of infectious diseases* 38: 860-866
70. De Alba I, Amin A, (2014) Pneumonia readmissions: risk factors and implications. *Ochsner J* 14: 649-654
71. Desautels T, Das R, Calvert J, Trivedi M, Summers C, Wales DJ, Ercole A, (2017) Prediction of early unplanned intensive care unit readmission in a UK tertiary care hospital: a cross-sectional machine learning approach. *BMJ Open* 7: e017199
72. Donze J, Lipsitz S, Bates DW, Schnipper JL, (2013) Causes and patterns of readmissions in patients with common comorbidities: retrospective cohort study. *BMJ* 347: f7171
73. Emerson CB, Eyzaguirre LM, Albrecht JS, Comer AC, Harris AD, Furuno JP, (2012) Healthcare-associated infection and hospital readmission. *Infect Control Hosp Epidemiol* 33: 539-544
74. Fernando SM, Mclsaac DI, Perry JJ, Rochweg B, Bagshaw SM, Thavorn K, Seely AJE, Forster AJ, Fiest KM, Dave C, Tran A, Reardon PM, Tanuseputro P, Kyeremanteng K, (2019) Frailty and Associated Outcomes and Resource Utilization Among Older ICU Patients With Suspected Infection. *Crit Care Med* 47: e669-e676
75. Fox J, Lekoubou A, Bishu KG, Ovbiagele B, (2019) Seizure comorbidity boosts odds of 30-day readmission after an index hospitalization for sepsis. *Epilepsy Behav* 95: 148-153
76. Genga KR, Lo C, Cirstea MS, Leitao Filho FS, Walley KR, Russell JA, Linder A, Francis GA, Boyd JH, (2018) Impact of PCSK9 loss-of-function genotype on 1-year mortality and recurrent infection in sepsis survivors. *EBioMedicine* 38: 257-264
77. Iwashyna TJ, Cooke CR, Wunsch H, Kahn JM, (2012) Population burden of long-term survivorship after severe sepsis in older Americans. *J Am Geriatr Soc* 60: 1070-1077
78. Khong CJ, Baggs J, Kleinbaum D, Cochran R, Jernigan JA, (2015) The Likelihood of Hospital Readmission Among Patients With Hospital-Onset Central Line-Associated Bloodstream Infections. *Infect Control Hosp Epidemiol* 36: 886-892
79. Lai JI, Lin HY, Lai YC, Lin PC, Chang SC, Tang GJ, (2012) Readmission to the intensive care unit: a population-based approach. *J Formos Med Assoc* 111: 504-509
80. Lee H, Doig CJ, Ghali WA, Donaldson C, Johnson D, Manns B, (2004) Detailed cost analysis of care for survivors of severe sepsis. *Crit Care Med* 32: 981-985
81. Liu V, Escobar GJ, Greene JD, Soule J, Whippy A, Angus DC, Iwashyna TJ, (2014) Hospital deaths in patients with sepsis from 2 independent cohorts. *JAMA* 312: 90-92
82. Maddox KEJ, Orav EJ, Zheng J, Epstein AM, (2018) Evaluation of Medicare's Bundled Payments Initiative for Medical Conditions. *New Engl J Med* 379: 260-269



83. Melzer M, Welch C, (2013) Outcomes in UK patients with hospital-acquired bacteraemia and the risk of catheter-associated urinary tract infections. *Postgraduate medical journal* 89: 329-334
84. Middleton A, Downer B, Haas A, (2019) Functional Status Is Associated With 30-Day Potentially Preventable Readmissions Following Home Health Care: Erratum. *Med Care* 57: 659
85. Mine A, Ikeda S, Makiishi T, Matsushita R, (2019) Preventability of Early Versus Late Hospital Readmissions. *Ann Intern Med* 170: 218
86. Neupane B, Walter SD, Krueger P, Marrie T, Loeb M, (2010) Predictors of in-hospital mortality and re-hospitalization in older adults with community-acquired pneumonia: a prospective cohort study. *BMC geriatrics* 10: 22
87. Ohnuma T, Shinjo D, Brookhart AM, Fushimi K, (2018) Predictors associated with unplanned hospital readmission of medical and surgical intensive care unit survivors within 30 days of discharge. *J Intensive Care* 6: 14
88. Ouane I, Schwebel C, Francais A, Bruel C, Philippart F, Vesin A, Soufir L, Adrie C, Garrouste-Orgeas M, Timsit JF, Misset B, Outcomerea Study G, (2012) A model to predict short-term death or readmission after intensive care unit discharge. *J Crit Care* 27: 422 e421-429
89. Perez-Moreno MA, Calderon-Hernanz B, Comas-Diaz B, Tarradas-Torras J, Borges-Sa M, (2015) [Analysis of the concordance of antibiotic treatment for patients with severe sepsis in emergencies]. *Rev Esp Quimioter* 28: 295-301
90. Shen HN, Li CY, (2015) Risk Factors of Readmissions Among Severe Sepsis Survivors. *Crit Care Med* 43: e461
91. Shorr AF, Zilberberg MD, Reichley R, Kan J, Hoban A, Hoffman J, Micek ST, Kollef MH, (2013) Readmission following hospitalization for pneumonia: the impact of pneumonia type and its implication for hospitals. *Clinical infectious diseases : an official publication of the Infectious Diseases Society of America* 57: 362-367
92. Sogaard M, Thomsen RW, Bang RB, Schonheyder HC, Norgaard M, (2015) Trends in length of stay, mortality and admission in patients with community-acquired bacteraemia. *Clin Microbiol Infect* 21: 789 e781-787
93. Stein J, Ossman P, Viera A, Moore C, Brubaker BA, French J, Liles EA, (2016) Was This Readmission Preventable? Qualitative Study of Patient and Provider Perceptions of Readmissions. *Southern Medical Journal* 109: 383-389
94. Stevens V, Geiger K, Concannon C, Nelson RE, Brown J, Dumyati G, (2014) Inpatient costs, mortality and 30-day re-admission in patients with central-line-associated bloodstream infections. *Clin Microbiol Infect* 20: O318-324
95. Tam OY, Lam SM, Shum HP, Lau CW, Chan KK, Yan WW, (2014) Characteristics of patients readmitted to intensive care unit: a nested case-control study. *Hong Kong medical journal = Xianggang yi xue za zhi* 20: 194-204
96. Vahedi HSM, Bagheri A, Jahanshir A, Seyedhosseini J, Vahidi E, (2019) Association of Lymphopenia with Short Term Outcomes of Sepsis Patients; a Brief Report. *Arch Acad Emerg Med* 7
97. Yende S, D'Angelo G, Kellum JA, Weissfeld L, Fine J, Welch RD, Kong L, Carter M, Angus DC, Gen IMSI, (2008) Inflammatory markers at hospital discharge predict subsequent mortality after pneumonia and sepsis. *Am J Respir Crit Care Med* 177: 1242-1247
98. Zilberberg MD, Nathanson BH, Sulham K, Fan W, Shorr AF, (2017) 30-day readmission, antibiotics costs and costs of delay to adequate treatment of Enterobacteriaceae UTI, pneumonia, and sepsis: a retrospective cohort study. *Antimicrob Resist Infect Control* 6: 124
99. Beumier M, Devriendt J, Gottignies P, Vincent JL, (2009) Readmission to the Intensive Care Unit after hospital discharge is not associated with worse outcome. *Intensive Care Medicine* 35: S295
100. Guerra DM, Jones SF, Thomas S, Arroliga AC, (2010) Examining readmissions in ICU patients: An observational study after hospital discharge. *Chest* 138: no pagination
101. Li L, Shrestha S, Baser O, Yuce H, Wang L, (2015) Mortality and rehospitalization rates among hospitalized pneumonia patients in the U.S. medicare population. *Value in Health* 18: A171
102. Shorr AF, Zilberberg M, Kan J, Hoffman J, Micek S, Kollef M, (2013) The epidemiology of readmission following hospitalization for pneumonia. *American Journal of Respiratory and Critical Care Medicine* 187: no pagination
103. Sogaard M, Norgaard M, Thomsen RW, Schonheyder HC, (2012) Time trends in length of hospital stay, post-discharge mortality, and risk of readmission among patients hospitalised for community-acquired bacteraemia in Denmark, 1995-2006. *Clinical Microbiology and Infection* 18: 121
104. Yap VL, Mutneja R, Metersky ML, (2014) Thirty-day readmissions after pneumonia: How many are deemed preventable? *American Journal of Respiratory and Critical Care Medicine* 189: no pagination
105. Gadre S, Gour A, Shah M, Chaudhury P, Joshi H, (2017) Etiologies, Trends, and Predictors of 30-Day Readmission in Patients With Sepsis. *Chest* 152: 410a-410a
106. Kim J, Ryoo S, Sohn C, Seo D, Lim K, Kim W, (2018) Risk Factors for Same Pathogen Sepsis Readmissions Following Hospitalization for Septic Shock. *Annals of emergency medicine* 72: S60-S61
107. Patel J, Greenwood H, Lugg S, Howells P, Gao F, Sapey E, Thickett D, (2016) S16 Simvastatin improves neutrophil migration in elderly patients with septic pneumonia and reduces 6-month mortality and re-admissions: results of the snoopi trial. *Thorax* 71: A11-A12
108. Zogg CK, Zafar SN, Shah AA, Ottesen TD, Wasif N, Haider AH, (2017) Not all readmissions are equal: Results of care fragmentation on outcomes and payment implications for common medical and surgical conditions. *Journal of the American College of Surgeons* 225: S123-S124

## MOOSE Checklist

| Reporting ITEM                                                                                                                                                                                                                                                                                                                                                                                                                                                                                                                                                                                                                                                                                                                                                                                                                                                                     | Manuscript section        | Page-Number |
|------------------------------------------------------------------------------------------------------------------------------------------------------------------------------------------------------------------------------------------------------------------------------------------------------------------------------------------------------------------------------------------------------------------------------------------------------------------------------------------------------------------------------------------------------------------------------------------------------------------------------------------------------------------------------------------------------------------------------------------------------------------------------------------------------------------------------------------------------------------------------------|---------------------------|-------------|
| Reporting of background should include <ul style="list-style-type: none"> <li>• Problem definition</li> <li>• Hypothesis statement</li> <li>• Description of study outcome(s)</li> <li>• Type of exposure or intervention used Type of study designs used</li> <li>• Study population</li> </ul>                                                                                                                                                                                                                                                                                                                                                                                                                                                                                                                                                                                   | Introduction              | 4           |
|                                                                                                                                                                                                                                                                                                                                                                                                                                                                                                                                                                                                                                                                                                                                                                                                                                                                                    | Introduction              | 4           |
|                                                                                                                                                                                                                                                                                                                                                                                                                                                                                                                                                                                                                                                                                                                                                                                                                                                                                    | Introduction              | 4, 5        |
|                                                                                                                                                                                                                                                                                                                                                                                                                                                                                                                                                                                                                                                                                                                                                                                                                                                                                    | Method                    | 6           |
|                                                                                                                                                                                                                                                                                                                                                                                                                                                                                                                                                                                                                                                                                                                                                                                                                                                                                    | Method                    | 7           |
| Reporting of search strategy should include <ul style="list-style-type: none"> <li>• Qualifications of searchers (eg, librarians and investigators)</li> <li>• Search strategy, including time period included in the synthesis and keywords</li> <li>• Effort to include all available studies, including contact with authors</li> <li>• Databases and registries searched</li> <li>• Search software used, name and version, including special features used (eg, explosion)</li> <li>• Use of hand searching (eg, reference lists of obtained articles)</li> <li>• List of citations located and those excluded, including justification</li> <li>• Method of addressing articles published in languages other than English</li> <li>• Method of handling abstracts and unpublished studies</li> <li>• Description of any contact with authors</li> </ul>                      | Title Page                | 1           |
|                                                                                                                                                                                                                                                                                                                                                                                                                                                                                                                                                                                                                                                                                                                                                                                                                                                                                    | Methods                   | 6-7         |
|                                                                                                                                                                                                                                                                                                                                                                                                                                                                                                                                                                                                                                                                                                                                                                                                                                                                                    | Results                   | 7-9 and ESM |
|                                                                                                                                                                                                                                                                                                                                                                                                                                                                                                                                                                                                                                                                                                                                                                                                                                                                                    | Methods                   | 6-7         |
|                                                                                                                                                                                                                                                                                                                                                                                                                                                                                                                                                                                                                                                                                                                                                                                                                                                                                    | Results                   | 7-10        |
|                                                                                                                                                                                                                                                                                                                                                                                                                                                                                                                                                                                                                                                                                                                                                                                                                                                                                    | N/A                       |             |
| Reporting of methods should include <ul style="list-style-type: none"> <li>• Description of appropriateness of studies assembled for assessing the hypothesis</li> <li>• Rationale for the selection and coding of data</li> <li>• Documentation of how data were classified and coded</li> <li>• Assessment of confounding</li> <li>• Assessment of study quality, including blinding of quality assessors; stratification or regression on possible predictors of study results</li> <li>• Assessment of heterogeneity</li> <li>• Description of statistical methods (eg, complete description of fixed or random effects models justification of whether the chosen models account for predictors of study results, dose-response models, or cumulative meta-analysis) in sufficient detail to be replicated</li> <li>• Provision of appropriate tables and graphics</li> </ul> | Results                   | 7, 8        |
|                                                                                                                                                                                                                                                                                                                                                                                                                                                                                                                                                                                                                                                                                                                                                                                                                                                                                    | Statistics                | 7           |
|                                                                                                                                                                                                                                                                                                                                                                                                                                                                                                                                                                                                                                                                                                                                                                                                                                                                                    | Statistics                | 7           |
|                                                                                                                                                                                                                                                                                                                                                                                                                                                                                                                                                                                                                                                                                                                                                                                                                                                                                    | Introduction              | 4, 5        |
|                                                                                                                                                                                                                                                                                                                                                                                                                                                                                                                                                                                                                                                                                                                                                                                                                                                                                    | Results                   | 8           |
|                                                                                                                                                                                                                                                                                                                                                                                                                                                                                                                                                                                                                                                                                                                                                                                                                                                                                    | Results                   | 8, 9        |
|                                                                                                                                                                                                                                                                                                                                                                                                                                                                                                                                                                                                                                                                                                                                                                                                                                                                                    | Statistics                | 7-8         |
|                                                                                                                                                                                                                                                                                                                                                                                                                                                                                                                                                                                                                                                                                                                                                                                                                                                                                    | Results                   | All         |
| Reporting of results should include <ul style="list-style-type: none"> <li>• Graphic summarizing individual study estimates and overall estimate</li> <li>• Table giving descriptive information for each study included</li> <li>• Results of sensitivity testing (eg, subgroup analysis)</li> <li>• Indication of statistical uncertainty of findings</li> </ul>                                                                                                                                                                                                                                                                                                                                                                                                                                                                                                                 | Figure-3                  |             |
|                                                                                                                                                                                                                                                                                                                                                                                                                                                                                                                                                                                                                                                                                                                                                                                                                                                                                    | Table-1                   |             |
|                                                                                                                                                                                                                                                                                                                                                                                                                                                                                                                                                                                                                                                                                                                                                                                                                                                                                    | Table-2                   |             |
|                                                                                                                                                                                                                                                                                                                                                                                                                                                                                                                                                                                                                                                                                                                                                                                                                                                                                    | N/A                       |             |
|                                                                                                                                                                                                                                                                                                                                                                                                                                                                                                                                                                                                                                                                                                                                                                                                                                                                                    | Figure-3                  |             |
| Reporting of discussion should include <ul style="list-style-type: none"> <li>• Quantitative assessment of bias (eg, publication bias)</li> <li>• Justification for exclusion (eg, exclusion of non-English-language citations)</li> <li>• Assessment of quality of included studies</li> </ul>                                                                                                                                                                                                                                                                                                                                                                                                                                                                                                                                                                                    | Egger's test              | eTable2     |
|                                                                                                                                                                                                                                                                                                                                                                                                                                                                                                                                                                                                                                                                                                                                                                                                                                                                                    | Discussion                | 11, 12      |
|                                                                                                                                                                                                                                                                                                                                                                                                                                                                                                                                                                                                                                                                                                                                                                                                                                                                                    | Discussion                | 11          |
| Reporting of conclusions should include <ul style="list-style-type: none"> <li>• Consideration of alternative explanations for observed results</li> <li>• Appropriate for the data presented and within the domain of the literature review)</li> <li>• Guidelines for future research</li> <li>• Disclosure of funding source</li> </ul>                                                                                                                                                                                                                                                                                                                                                                                                                                                                                                                                         | Discussion and Conclusion | 14          |
|                                                                                                                                                                                                                                                                                                                                                                                                                                                                                                                                                                                                                                                                                                                                                                                                                                                                                    | Title page                | 2           |
